# Supplementary material for: Membrane Sterol Composition in Arabidopsis thaliana Affects Root Elongation via Auxin Biosynthesis
Source: Int J Mol Sci. 2021 Jan 4;22(1):437. doi: 10.3390/ijms22010437 (PMC7794993; doi:10.3390/ijms22010437)
Supplement: Supplementary file 1 [file ijms-22-00437-s001.pdf]

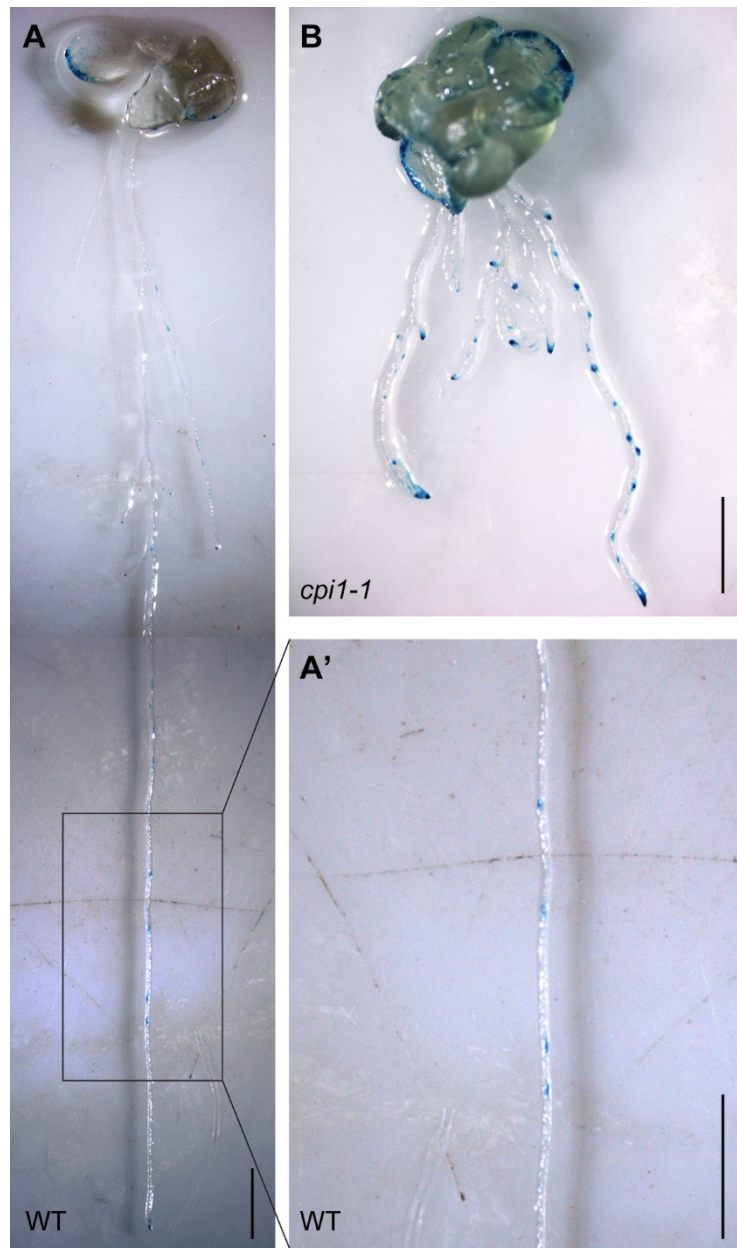

**Fig. S2.** *DR5:GUS* expression in shoot, root tips and lateral root primordia of 2-week-old WT (A and A' ) and *cpi1-1* (B) seedlings. A' are higher magnification image of the root region in A. Shown are representative images of n = 3 independent experiments, employing 6 to 10 seedlings per experiment. Bars = 2 mm (A and B) and 8 mm (A').

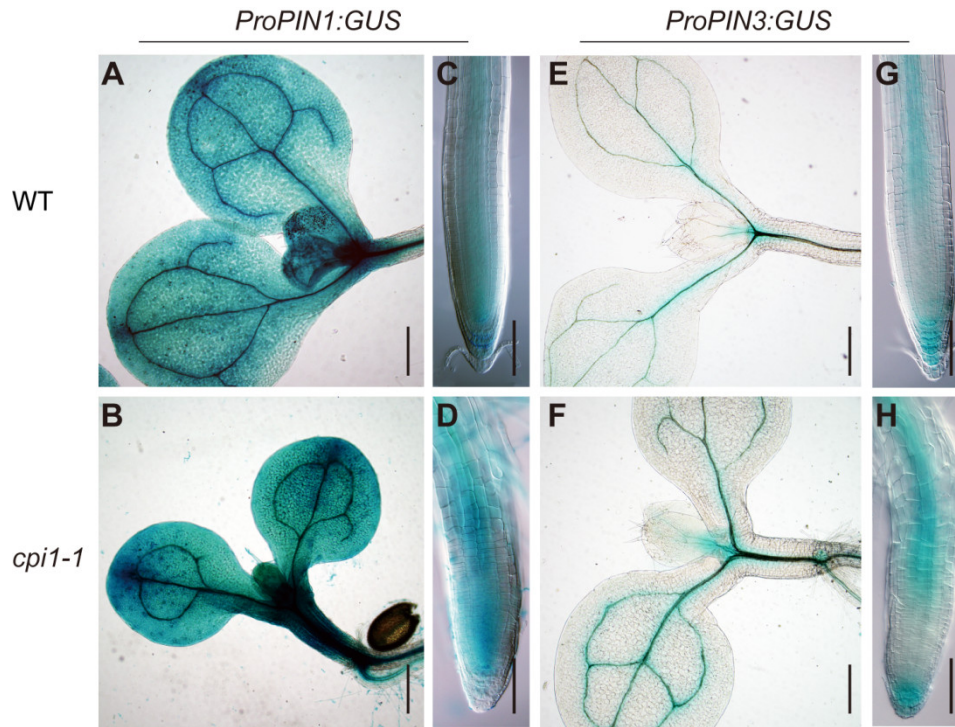

**Fig. S3.** *ProPIN1:GUS* and *ProPIN3:GUS* expression in seedling shoots and roots. **(A-H)** GUS staining of *ProPIN1:GUS* (A-D) and *ProPIN3:GUS* (E-H) in 5-day-old wild type (WT) and *cpi1-1* seedlings. Shown are representative images of  $n = 3$  independent experiments, employing 7 to 31 seedlings per experiment. Bars = 400  $\mu\text{m}$  (A, B, E and F) and 100  $\mu\text{m}$  (C, D, G and H).

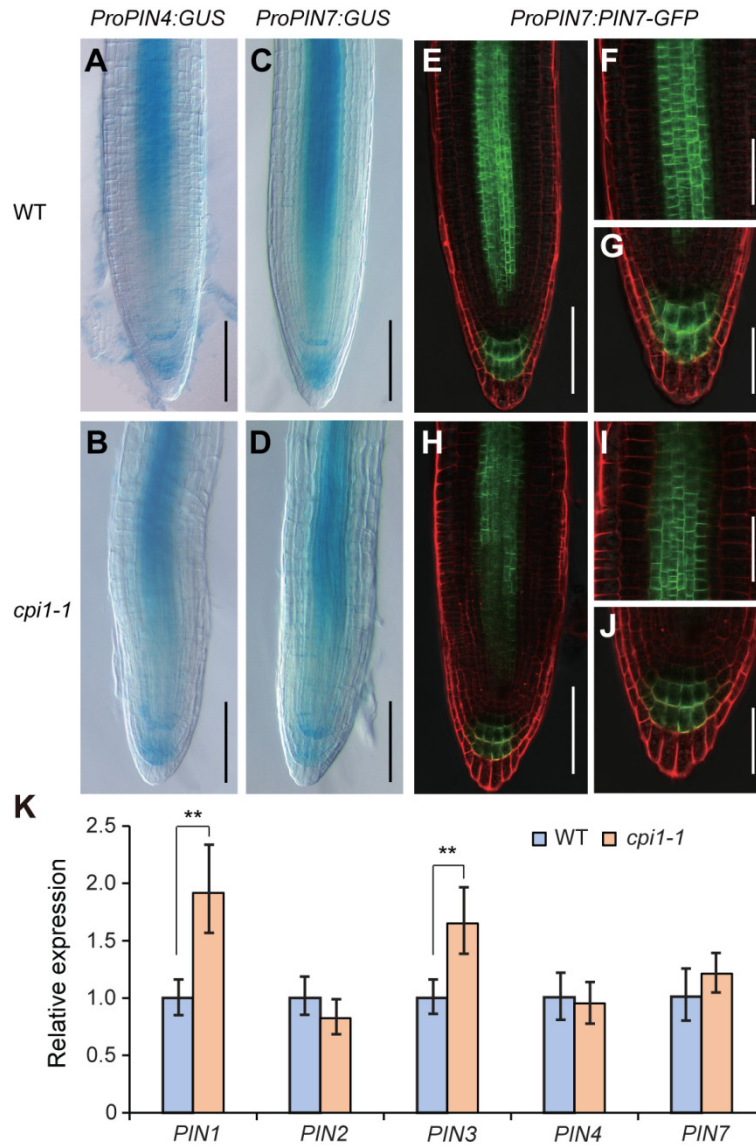

**Fig. S4.** *ProPIN4:GUS*, *ProPIN7:GUS* and *PIN7-GFP* expression in WT and *cpi1-1* roots and relative transcript levels of PIN genes. **(A-D)** GUS staining of *ProPIN4:GUS* (A and B) and *ProPIN7:GUS* (C and D) in 5-day-old WT (A and C) and *cpi1-1* (B and D) seedling roots; **(E-J)** GFP signals of *PIN7-GFP* in 5-day-old WT (E-G) and *cpi1-1* (H-J) seedling roots. F and G are higher magnification images of the stele and columella regions, respectively in E; I and J are higher magnification images of the stele and columella regions, respectively in H. Shown are representative images of  $n = 3$  independent experiments, employing 9 to 26 roots per experiment. Bars = 100  $\mu$ m (A- E and H) and 50  $\mu$ m (F, G, I and J); **(K)** Relative transcript levels of polar auxin transport genes. The *TAP42 INTERACTING PROTEIN OF 41 KDA (TIP41, AT4G34270)* gene was used as an internal control. The presented data are means  $\pm$  SD of  $n = 3$  independent experiments. \*\* $P < 0.01$  (Student's *t*-test, one-tailed, two-sample equal variance).

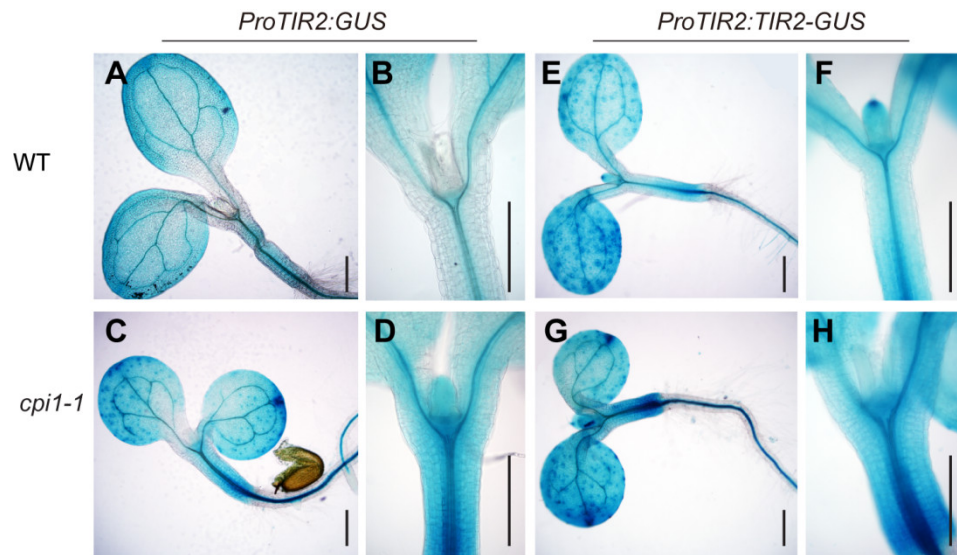

**Fig. S5.** *ProTIR2:GUS* and *ProTIR2:TIR2-GUS* expression patterns in WT and *cpi1-1* shoots. **(A-D)** Expression patterns of *ProTIR2:GUS* in 5-day-old WT (A and B) and *cpi1-1* (C and D) seedling shoots; **(E-H)** Expression patterns of *ProTIR2:TIR2-GUS* in 5-day-old WT (E and F) and *cpi1-1* (G and H) seedling shoots. Shown are representative images of  $n = 3$  independent experiments, employing 6 to 30 seedlings per experiment. Bars = 400  $\mu\text{m}$ .

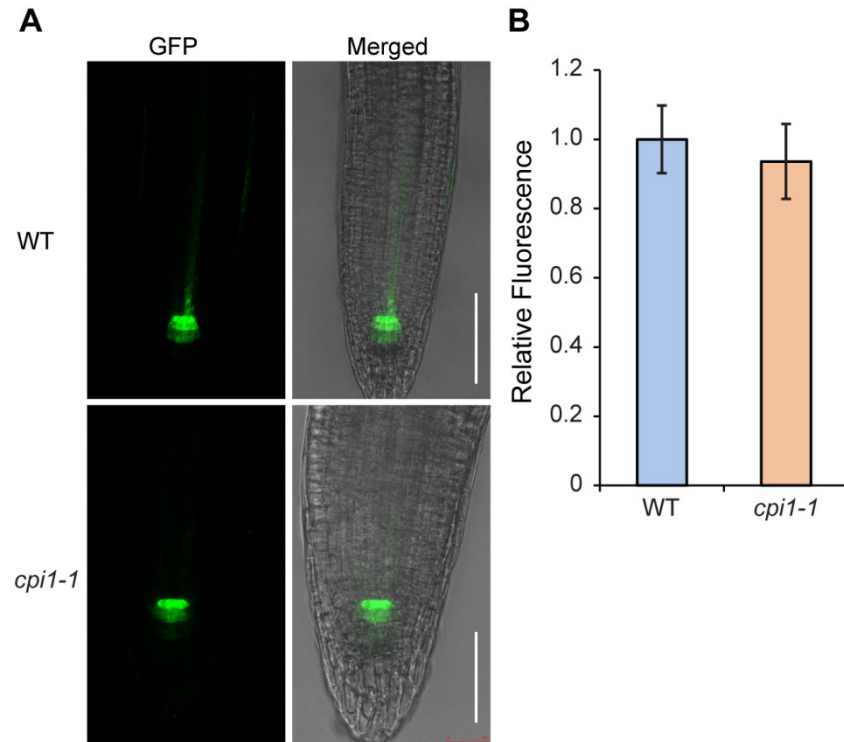

**Fig. S6.** *ProTAA1:GFP-TAA1* expression in 5-day-old WT and *cpi1-1* seedling roots. **(A and B)** Expression patterns of *ProTAA1:GFP-TAA1* in root tips (A) and quantification of GFP fluorescence (B). The presented data are means  $\pm$  SD of  $n = 3$  independent experiments (employing 4 to 22 roots per experiment). No significant difference by Student's *t*-test (one-tailed, two-sample equal variance,  $P < 0.05$ ). Bars = 100  $\mu$ m.

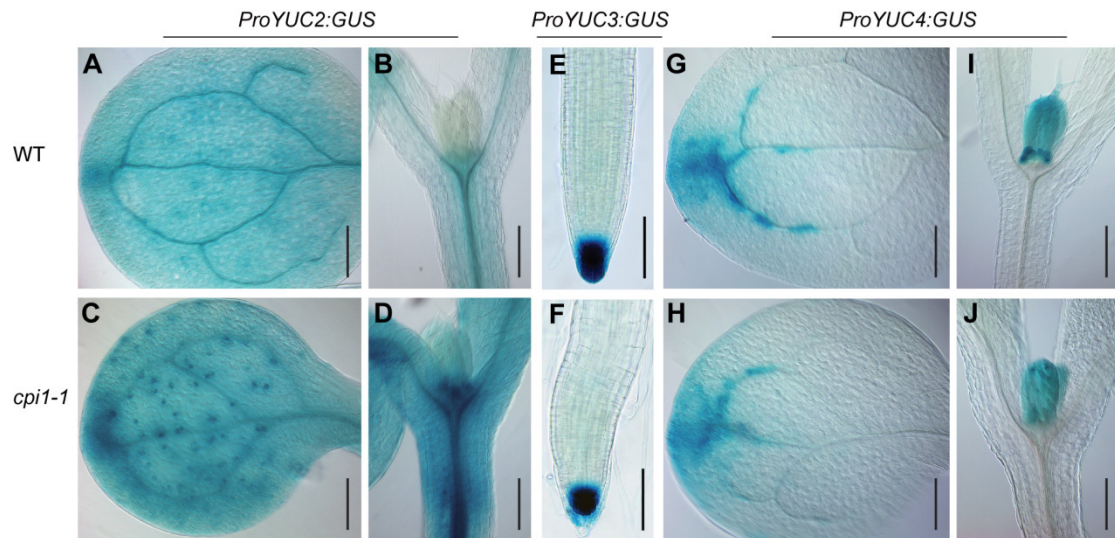

**Fig. S7.** *ProYUC2:GUS*, *ProYUC3:GUS* and *ProYUC4:GUS* expression patterns in 5-day-old seedlings. **(A-D)** GUS staining of *ProYUC2:GUS* in 5-day-old WT (A and B) and *cpi1-1* (C and D) seedling cotyledon (A and C), shoot meristem and apical part of the hypocotyl (B and D); **(E-F)** GUS staining of *ProYUC3:GUS* in 5-day-old WT (E) and *cpi1-1* (F) seedling roots; **(G-J)** GUS staining of *ProYUC4:GUS* in 5-day-old WT (G and I) and *cpi1-1* (H and J) seedling cotyledon (G and H), shoot meristem and apical part of the hypocotyl (I and J). Shown are representative images of  $n = 3$  independent experiments, employing 8 to 14 seedlings per experiment. Bars = 200  $\mu\text{m}$  in (A-D and G-J) and Bars = 100  $\mu\text{m}$  in (E and F).

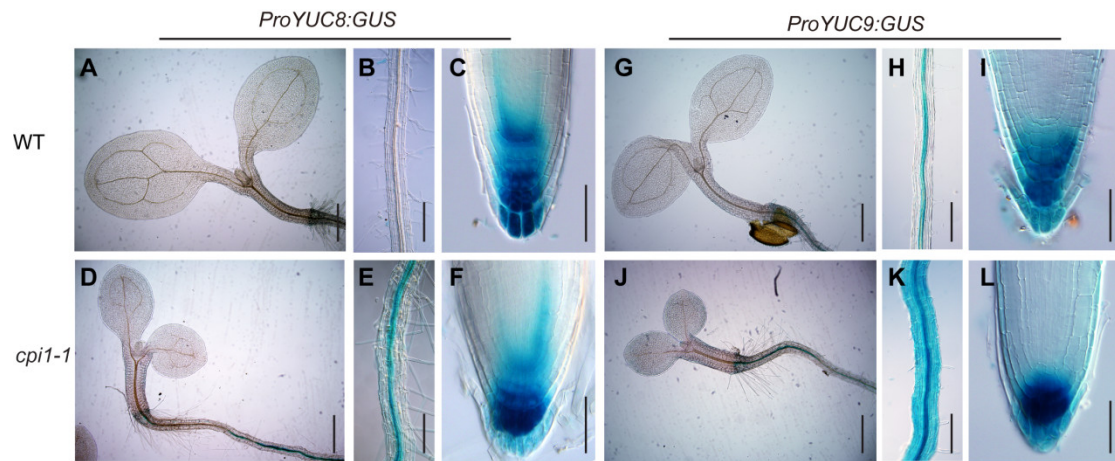

**Fig. S8.** *ProYUC8:GUS* and *ProYUC9:GUS* expression patterns in 5-day-old WT and *cpi1-1* seedling shoot, root vasculature, and root tip. **(A-F)** Expression patterns of *ProYUC8:GUS* in 5-day-old WT (A-C) and *cpi1-1* (D-F) seedlings; **(G-L)** Expression patterns of *ProYUC9:GUS* in 5-day-old WT (G-I) and *cpi1-1* (J-L) seedlings. Shown are representative images of  $n = 3$  independent experiments, employing 6 to 22 seedlings per experiment. Bars = 0.5 mm in (A, D, G, and J), 200  $\mu$ m in (B, E, H, and K), and 50  $\mu$ m in (C, F, I, and L).

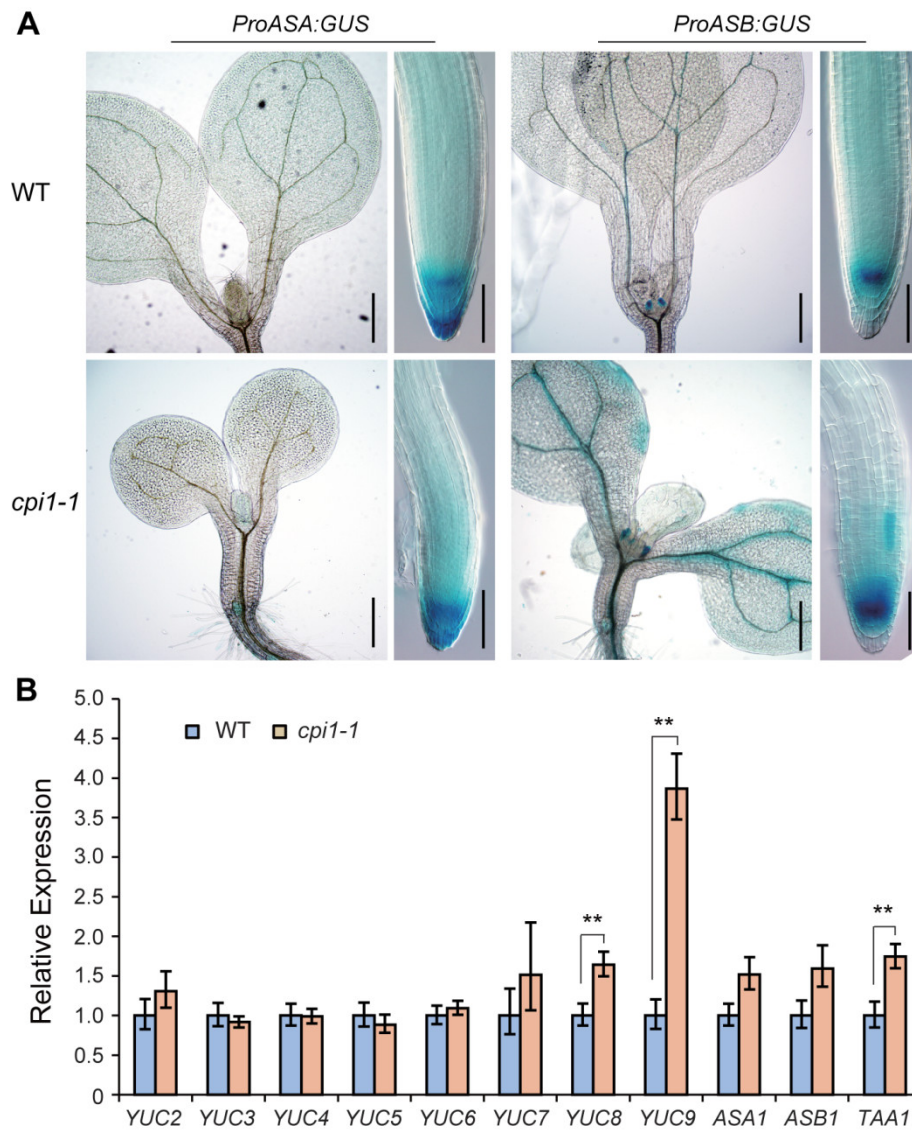

**Fig. S9.** *ProASA1:GUS* and *ProASB1:GUS* expression patterns in WT and *cpi1-1* seedlings and relative transcript levels of auxin biosynthesis genes. **(A)** Expression patterns of *ProASA1:GUS* and *ProASB1:GUS* in shoots and roots of 5-day-old WT and *cpi1-1* seedlings (n = 3 independent experiments, employing 8 to 24 seedlings per experiment). Bars = 400  $\mu$ m in the shoot images and 100  $\mu$ m in the root images; **(B)** Relative transcript levels of auxin biosynthesis genes. The *TIP41* gene was used as an internal control. The presented data are means  $\pm$  SD of n = 3 independent experiments. \*\* $P$  < 0.01 (Student's *t*-test, one-tailed, two-sample equal variance).

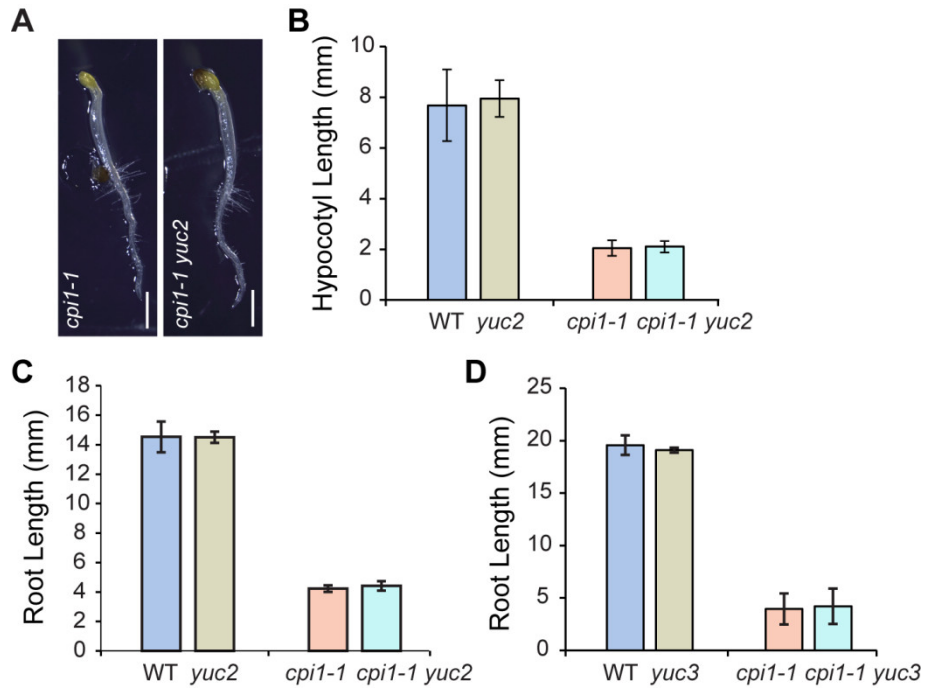

**Fig. S10.** Mutation of *YUC2* or *YUC3* does not rescue the short root and short hypocotyl phenotypes of *cpi1-1*. The presented data are means  $\pm$  SD of  $n = 3$  independent experiments (employing 9 to 47 seedlings per experiment). No significant difference between *cpi1-1* single and *cpi1-1 yuc2* and *cpi1-1 yuc3* double mutants by Student's *t*-test (one-tailed, two-sample equal variance,  $P < 0.05$ ).

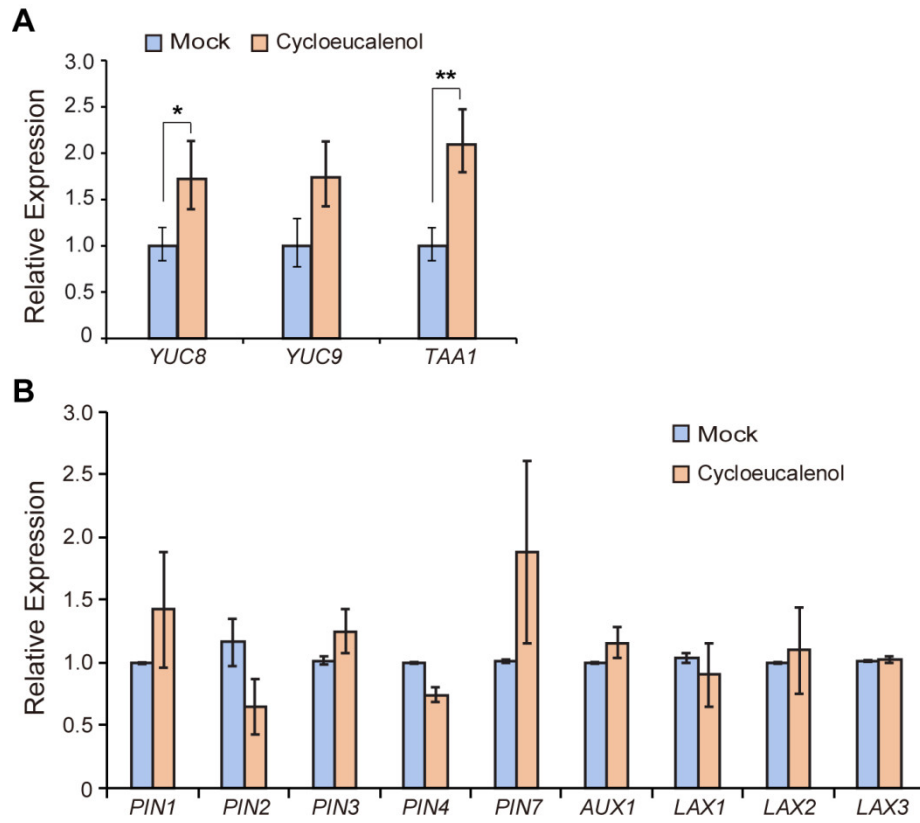

**Fig. S11.** Relative transcript levels of auxin biosynthesis genes (**A**) and polar auxin transport genes (**B**) upon cycloeucalenol treatment. WT seeds were germinated on MS medium supplemented with 0.1% (v/v) acetone (mock) or 1  $\mu$ M cycloeucalenol for 7 days. Then these 7-day-old seedlings were collected for RT-qPCR analysis. The *TIP41* gene was used as an internal control. The presented data are means  $\pm$  SD of  $n = 3$  independent experiments. \* $P < 0.05$ ; \*\* $P < 0.01$  (Student's *t*-test, one-tailed, two-sample equal variance).

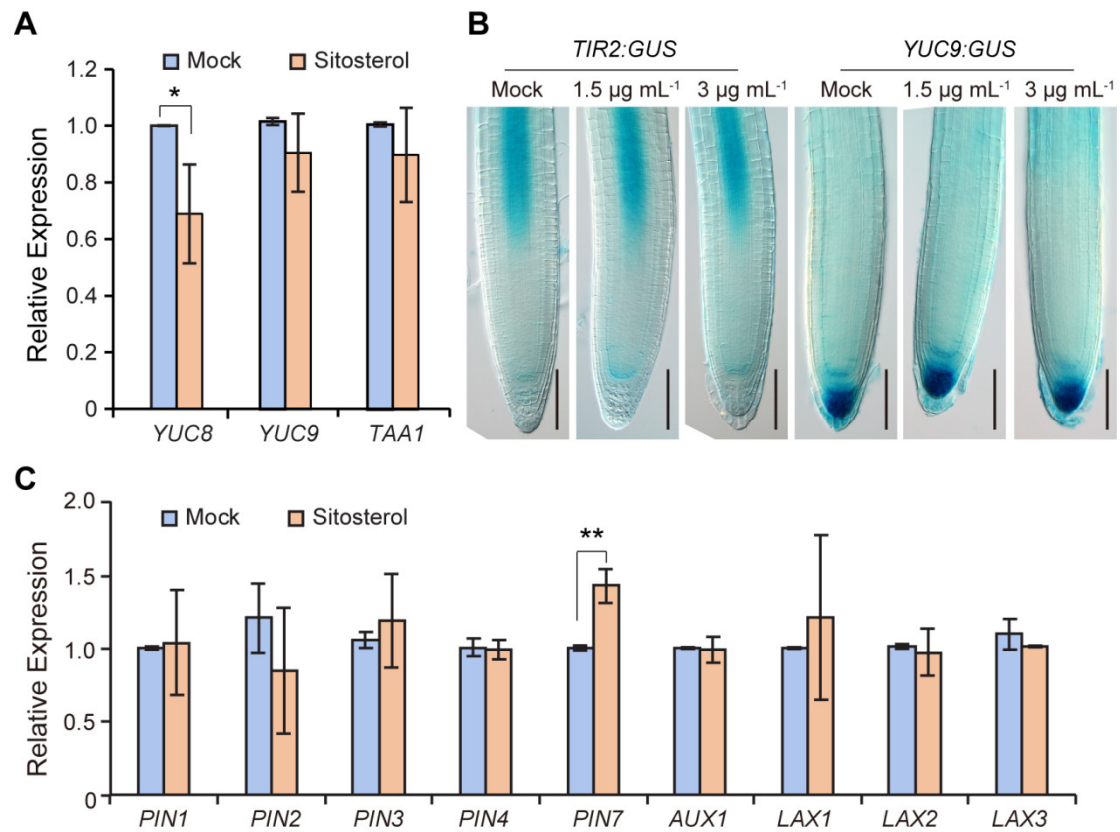

**Fig. S12.** Relative transcript levels of auxin biosynthesis and polar auxin transport genes up-on sitosterol treatment and *ProTIR2:GUS* and *ProYUC9:GUS* expression in seedling roots. **(A and C)** Relative transcript levels of auxin biosynthesis genes (A) and polar auxin transport genes (C) upon sitosterol treatment. WT seeds were germinated on MS medium supplemented with 0.1% (v/v) chloroform (mock) or 3  $\mu\text{g mL}^{-1}$  of sitosterol for 7 days. Then these 7-day-old seedlings were collected for RT-qPCR analysis. The *TIP41* gene was used as an internal control. The presented data are means  $\pm$  SD of  $n = 3$  independent experiments. \* $P < 0.05$ , \*\* $P < 0.01$  (Student's *t*-test, one-tailed, two-sample equal variance); **(B)** Expression patterns of *ProTIR2:GUS* and *ProYUC9:GUS* after treatment with various concentrations of sitosterol for 5 days. The images are representative of  $n = 3$  independent experiments employing 7 to 17 roots per experiment.

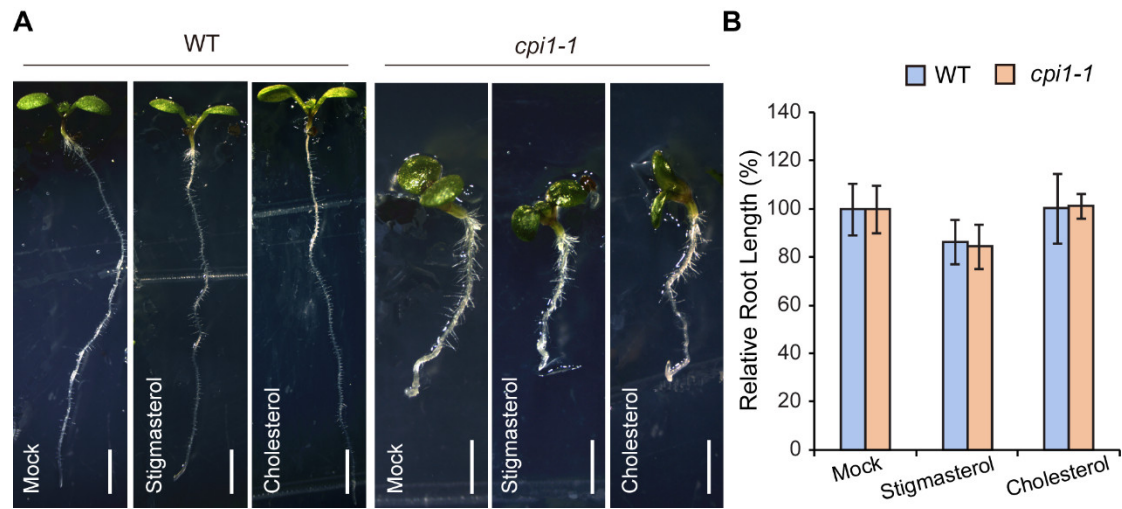

**Fig. S13.** Effects of stigmasterol and cholesterol on WT and *cpi1-1* root growth. **(A and B)** Phenotypes (A) and relative root length (B) of 7-day-old seedlings grown on MS medium supplemented with 1  $\mu$ M stigmasterol or 10  $\mu$ M cholesterol. The presented data in (B) are means  $\pm$  SD of  $n = 3$  independent experiments (employing 15 to 69 roots per experiment). No significant difference between mock and treatment in either WT or *cpi1-1* mutant by Student's *t*-test (one-tailed, two-sample equal variance,  $P < 0.05$ ). Bars = 2 mm.

**Table S1.** List of primers used in this study.

| Purpose    | Primer name       | Sequence (5' to 3')       |
|------------|-------------------|---------------------------|
| Genotyping | LBa1              | TGGTTCACGTAGTGGGCCATC     |
|            | SAIL-LB1          | TTTTCAGAAATGGATAAATAGCC   |
|            | Ds5-1             | ACGGTCGGGAAACTAGCTCTAC    |
|            | <i>cpi1-1_LP</i>  | CTCGGCTCACTCACTCACACT     |
|            | <i>cpi1-1_RP</i>  | CTGCCGAGATAATGCTGTGCTT    |
|            | <i>aux1-T_LP</i>  | GGTTTACTAGGAAGCTGGACTGC   |
|            | <i>aux1-T_RP</i>  | TGGACCTGAATGTTTCACACC     |
|            | <i>pin2-T_LP</i>  | GGTCAACGAGTGGAGCAAGT      |
|            | <i>pin2-T_RP</i>  | GCCATTCCAAGACCAGCATCA     |
|            | <i>wei8-1_LP</i>  | CATCAGAGAGACGGTGGTGAAC    |
|            | <i>wei8-1_RP</i>  | GCTTTTAATGAGCTTCATGTTGG   |
|            | <i>yuc2_1031F</i> | GCTCAAGTGGTTTCCAGTGCA     |
|            | <i>yuc2_1828R</i> | GCATCCACTACTACCTTTCTAC    |
|            | <i>yuc8_-176F</i> | ACGCCACATGGGATCTCTTC      |
|            | <i>yuc8_401R</i>  | GACTCACTCTTCGACACGGTC     |
|            | <i>yuc9_LP</i>    | CTTTACTCGACCGGGCTAGG      |
|            | <i>yuc9_RP</i>    | TTTACCGAGGGAGATTATGGG     |
| RT-qPCR    | TIP41_qF          | GTATGAAGATGAACTGGCTGACAAT |
|            | TIP41_qR          | ATCAACTCTCAGCCAAAATCGCAAG |
|            | PIN1_qF           | TTGCTGAGCTCCTACTTAAG      |
|            | PIN1_qR           | GGCATGGCTATGTTCACTCT      |
|            | PIN2_qF           | AAGTCACGTACATGCATGTG      |
|            | PIN2_qR           | AGATGCCAACGATAATGAGTG     |
|            | PIN3_qF           | GAGTTACCCGAACCTAATCA      |
|            | PIN3_qR           | TTACTGCGTGTCGCTATAGT      |
|            | PIN4_qF           | ACCACTTAACTAGAACTTCA      |
|            | PIN4_qR           | TCATTGCTGTGGGAAGTCT       |
|            | PIN7_qF           | TCTAGTTGCGTTCCACTAATC     |
|            | PIN7_qR           | CGGTAAAACATATGCCACCA      |
|            | AUX1_qF           | GCCTCCGCTCGTCAGAAT        |
|            | AUX1_qR           | ACGGTGGTGTAAAGCGGAGA      |

|         |                          |
|---------|--------------------------|
| LAX1_qF | TACTCCGAGACCTTCCAACCTACG |
| LAX1_qR | TCCACCGCCACCACTTCC       |
| LAX2_qF | GGAGAACGGTGAGAAAGC       |
| LAX2_qR | TCAGATAGCTTAGATTTGATGTC  |
| LAX3_qF | GGTTTATTGGGCGTTTGG       |
| LAX3_qR | TGATTGGTCCGAAAAAGG       |
| YUC2_qF | ACTCGCCACGGGTACAAAA      |
| YUC2_qR | CAATGGCTGCACCAAGCAAT     |
| YUC3_qF | GACATCGGAGCGTTACCCAA     |
| YUC3_qR | GCCTCTCCTTTCCATCCGTT     |
| YUC4_qF | ACCGACCTTTTAGGCCTTCG     |
| YUC4_qR | TCACGGCTTGCGTCACTTTA     |
| YUC5_qF | TTCAACGAGTGTGTCCAGTCTGCT |
| YUC5_qR | TCTCTGGAACAACCTTCTCCGCGT |
| YUC6_qF | TATACGCGGTCGGATTCA       |
| YUC6_qR | CCACCACAATCACTCTCACT     |
| YUC7_qF | TACCTTGAGTCCTACGCTACCC   |
| YUC7_qR | ACCACCAAAATCTTCTAAACCCT  |
| YUC8_qF | CGTCTCAAGCTTCACCTTCC     |
| YUC8_qR | AGCCACTGGTCTCATCGAAC     |
| YUC9_qF | GACGGAGTTTGACGGAGAAG     |
| YUC9_qR | CCCTCGGTAAAACATGAACC     |
| ASA1_qF | GTAGAGAAGCTTATGAACATCGA  |
| ASA1_qR | GGTGCACCACTAACTGTTCCAC   |
| ASB1_qF | GGGGAAGAGTCGTAGAGATGTCT  |
| ASB1_qR | CTGGCAGAGATTGTATGTGAAGC  |
| TAA1_qF | GATGAAGAATCGGTGGGAGA     |
| TAA1_qR | CGGACATGCTTCTTGTGAGA     |
